# Supplementary material for: Improved Cellulase Production of Trichoderma reesei by Regulating Mycelium Morphology
Source: MDPI journal article supplement (doi:10.3390/fermentation10010026), 2023-12-28
Supplement: s1 [file s1]

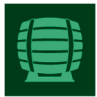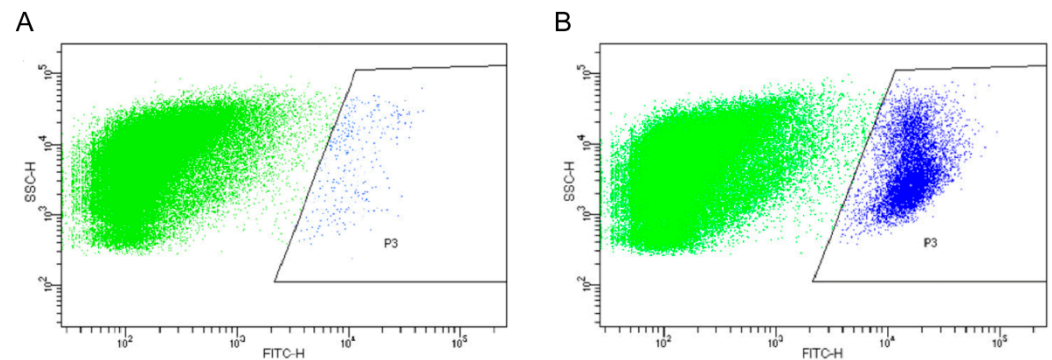

**Figure S1.** GFP fluorescence-based sorting of *cdc42*-overexpressing protoplasts by flow cytometry. (A) Control. (B) Protoplast of A2H transformed with *cdc42*-overexpressing cassette. Blue dots indicated the transformants overexpressing Cdc42 and GFP.

**Table S1.** Primers used in this study.

| Primers              | Sequences (5'–3')                             |
|----------------------|-----------------------------------------------|
| <i>cdc42</i> -up-F   | GCGTCTCTCTCACTCCATTGG                         |
| <i>cdc42</i> -up-R   | GTGAGTTCAGGCTTTTTCATGGTGGTGGCTGCTTGCTGATG     |
| <i>cdc42</i> -down-F | GTCCGAGGGCAAAGGAATAGAACCACGAGTCTCAGGAAATTG    |
| <i>cdc42</i> -down-R | CCAGCTCAGTCAGTCTTTCCTC                        |
| <i>cla4</i> -up-F    | GCGATTCTTGCGCGCATCTGATC                       |
| <i>cla4</i> -up-R    | GTGAGTTCAGGCTTTTTCATGTTGTTCTGCTCTGCTGGCGAG    |
| <i>cla4</i> -down-F  | GTCCGAGGGCAAAGGAATAGAAATAAACGGAGCAGTGCTG      |
| <i>cla4</i> -down-R  | ATGTTCTGCACTGCAATTAC                          |
| <i>rac1</i> -up-F    | TCTCACGCGCCACACACCCAC                         |
| <i>rac1</i> -up-R    | GTGAGTTCAGGCTTTTTCATGTCCCAAGTTTTCCTTTTCGGC    |
| <i>rac1</i> -down-F  | GTCCGAGGGCAAAGGAATAGAGGAGATTCTGGCCGTGCCATCTCG |
| <i>rac1</i> -down-R  | TGCCGGTCCATCTGCTGCTAT                         |
| <i>ras1</i> -up-F    | ACCTCCTACCTCATCGCCTGTG                        |
| <i>ras1</i> -up-R    | GTGAGTTCAGGCTTTTTCATTGTGAACGAGACTGTATGAGG     |
| <i>ras1</i> -down-F  | GTCCGAGGGCAAAGGAATAGGAGCGAGAAGTCACCAGGCAAG    |
| <i>ras1</i> -down-R  | ATAAATGGGATATAAGAGAAGAAAGTATGACC              |
| <i>ras2</i> -up-F    | CCGTCTCATAGGGACTTTCTG                         |
| <i>ras2</i> -up-R    | GTGAGTTCAGGCTTTTTCATGATGGGCGCAAAGAGTCAGCGGTTG |
| <i>ras2</i> -down-F  | GTCCGAGGGCAAAGGAATAGGCGCTTCTCATTCTGTTGCCG     |
| <i>ras2</i> -down-R  | GAGGTTAAATAAAGATATAAACAGATTGACA               |
| <i>rho1</i> -up-F    | TCGAGAGCCTAGAACCGACCG                         |
| <i>rho1</i> -up-R    | GTGAGTTCAGGCTTTTTCATGGCGTCTGTGAAGCTTTGCGG     |
| <i>rho1</i> -down-F  | GTCCGAGGGCAAAGGAATAGACGGTTCTCACCTTGTGCCTG     |
| <i>rho1</i> -down-R  | TAGAATAACCACTCGAAGCATACT                      |
| <i>spa2</i> -up-F    | GCCACGGCTTCATTTCTTG                           |
| <i>spa2</i> -up-R    | GTGAGTTCAGGCTTTTTCATTGCGGGTGGTGGGAGCGAGGC     |
| <i>spa2</i> -down-F  | GTCCGAGGGCAAAGGAATAGGCCTGGCAAGCCGGCATTAAATC   |
| <i>spa2</i> -down-R  | ACATTTGCGTGGTGCAAGTGG                         |
| <i>hph</i> -F        | ATGAAAAAGCCTGAACCTACCCGG                      |
| <i>hph</i> -R        | CTATTCTTTGCCCTCGGACGAGTG                      |
| <i>Ptef</i> -F       | GGGACAGAATGTACAGTACTATACT                     |
| <i>Ptef</i> -R       | TTTGACGGTTTGTGTGATGTAG                        |
| <i>cdc42</i> -F      | CTACATCACACAAACCGTCAAAATGGTGGTCGCAACCATCAAG   |
| <i>cdc42</i> -R      | AAGTTCAGGGTCTGCTTGACTAGAATGAGGCACCTGTGGG      |
| <i>2A</i> -F         | GTCAAGCAGACCCTGAACTTC                         |
| <i>eGFP</i> -R       | TTACTTGTACAGCTCGTCCATGC                       |
| <i>Teg1</i> -F       | TGGACGAGCTGTACAAGTAAAGCGTTGACTTGCCCTCTGGTC    |
| <i>Teg1</i> -R       | TGCATTTCAAGGGCGTTGCTG                         |
| <i>cdc42</i> -RT-F   | CAACCATCAAGTGGTGTGCTGTC                       |
| <i>cdc42</i> -RT-R   | CTCGTCACCGATCATGACGGTGA                       |
| <i>cla4</i> -RT-F    | CAGATCTCCGCCCCCTCAACGTCTC                     |
| <i>cla4</i> -RT-R    | CAGAGGCACCCTGACCGATCTTC                       |

|             |                          |
|-------------|--------------------------|
| rac1-RT-F   | ATCGCTGAAGTGTGTCGTGACCG  |
| rac1-RT-R   | TCTCGGGGAGCCACTTTGCGGCA  |
| ras1-RT-F   | CAGCAGCAACCAAGTTCCTGCGAG |
| ras1-RT-R   | TTCGGTAAGAGTCTTCAATTGTGG |
| ras2-RT-F   | CGTCGAGACGTACGACCCGACA   |
| ras2-RT-R   | GAGGAGGCTACCGACTCCTTGAC  |
| rho1-RT-F   | TTCCCTGAGGTCTACGTCCCTAC  |
| rho1-RT-R   | GACCTCCGAGATCCACTTCTCAAG |
| spa2-RT-F   | GACGACGATGAGGCGGATAAGAAG |
| spa2-RT-R   | CCTGCTTGAGCGAGTTGCTAAGC  |
| cel7b-RT-F  | GCCAACCAGTATAACACGGCC    |
| cel7b-RT-R  | GCCGTAGTAGCTTTTGTAGCCG   |
| cel3a-RT-F  | GCAGACAGTCACTCAACATCGG   |
| cel3a-RT-R  | CCGTCTTGAAGGCATAGCGATG   |
| cel3d-RT-F  | CATCTCAAGGTCTCCGAGGTAG   |
| cel3d-RT-R  | CTAGTACCTCAGAGACGGCATC   |
| cel3c-RT-F  | CTGCTGGCTGGTATCGACTTCTG  |
| cel3c-RT-R  | CACATGCGCACTCTTAGCGATG   |
| cel1a-RT-F  | ACGGCTGCCTACCAGATCGAG    |
| cel1a-RT-R  | ACTTGACGTAGTGGTCGATGC    |
| cel45a-RT-F | CACCACGCGCTACTACGATGGG   |
| cel45a-RT-R | GGTCACCATGACGATGATGCTC   |
| cel12a-RT-F | CGTCAAGTCGTACCAGAATC     |
| cel12a-RT-R | CCGTATTGCCAAGCCAGATCAT   |
| cel61a-RT-F | CCTTGACAACGGCTTCGTTTCAC  |
| cel61a-RT-R | CTTGAAGAACTCAAGCGTCGTC   |
| gh31-1-RT-F | CTACCAGACTGAGGACCGCATCC  |
| gh31-1-RT-R | GGAGGTACTGAGACTCGAAGAC   |
| bxl1-RT-F   | CTCGAGGAGCTCATTCTCAACAC  |
| bxl1-RT-R   | TCGAGATGATGTCGGCAATCTGG  |

Table S2. Proteome data set of A2H and OCdc42 strains.

| Protein ID        | Annotation                            | Name              | Family | OCdc42_iBAQ | A2H_iBAQ |
|-------------------|---------------------------------------|-------------------|--------|-------------|----------|
| TRIREDRAFT_39942  | $\beta$ -1,3-endoglucanase            | TRIREDRAFT_39942  | GH17   | 0           | 3767.2   |
| TRIREDRAFT_72704  | $\alpha$ -galactosidase               | AgI3              | GH27   | 213.5       | 3382.3   |
| TRIREDRAFT_123232 | Endo- $\beta$ -1,4-glucanase          | Cel12a            | GH12   | 142420      | 284490   |
| TRIREDRAFT_69276  | Endo- $\beta$ -1,6-galactanase        | TRIREDRAFT_69276  | GH30   | 118210      | 111500   |
| TRIREDRAFT_123039 | Cell wall protein                     | CwpB              | CWP    | 2687.7      | 2526.7   |
| TRIREDRAFT_120961 | Endoglucanase-7                       | Cel61b            | GH61   | 42640       | 18027    |
| TRIREDRAFT_54219  | Carbohydrate esterase family 5        | TRIREDRAFT_54219  | CE5    | 6438.2      | 2403.1   |
| TRIREDRAFT_120312 | Endoglucanase                         | Cel5a             | GH5    | 1329000     | 362200   |
| TRIREDRAFT_123989 | Cellobiohydrolase I                   | Cel7a (Cbh1)      | GH7    | 3035500     | 653120   |
| TRIREDRAFT_72567  | Cellobiohydrolase II                  | Cel6a (Cbh2)      | GH6    | 7542200     | 1123500  |
| TRIREDRAFT_76210  | Alpha-L-arabinofuranosidase           | Abf2              | GH62   | 210760      | 31025    |
| TRIREDRAFT_73638  | Cellulose induced protein 1           | Cip1              | CBM1   | 1721000     | 168440   |
| TRIREDRAFT_123283 | $\alpha$ -L-arabinofuranosidase       | Abf1              | GH54   | 126850      | 10167    |
| TRIREDRAFT_123992 | Non-Catalytic module family expansin  | TRIREDRAFT_123992 | CBM1   | 3022600     | 229060   |
| TRIREDRAFT_123940 | 4-O-methyl-glucuronoyl methylesterase | Cip2              | CBM1   | 2178300     | 98967    |
| TRIREDRAFT_120229 | Endo-1,4- $\beta$ -xylanase 3         | Xyn3              | GH10   | 1834500     | 76059    |
| TRIREDRAFT_49081  | Xyloglucanase                         | Cel74a            | GH74   | 3329800     | 133560   |
| TRIREDRAFT_121127 | Xylan 1,4- $\beta$ -xylosidase        | Bxl1              | GH3    | 1834900     | 70219    |
| TRIREDRAFT_73643  | Glycoside hydrolase family 61         | Cel61a            | GH61   | 2098100     | 66246    |
| TRIREDRAFT_74223  | Endo-1,4- $\beta$ -xylanase 1         | Xyn1              | GH11   | 22036610    | 576316.8 |
| TRIREDRAFT_122081 | Glucanase                             | Cel7b (Egl1)      | GH7    | 5256400     | 133010   |
| TRIREDRAFT_70845  | Endo- $\beta$ -1,3-glucanase          | TRIREDRAFT_70845  | PL3    | 27663.1     | 652.3    |
| TRIREDRAFT_72526  | $\alpha$ -glucuronidase               | AguA              | GH67   | 1441100     | 15951    |
| TRIREDRAFT_5836   | $\beta$ -mannosidase                  | TRIREDRAFT_5836   | GH2    | 207260      | 1841.7   |
| TRIREDRAFT_82235  | $\alpha$ -glucosidase                 | GH31-1            | GH31   | 121410      | 1008.6   |
| TRIREDRAFT_110894 | Endo- $\beta$ -1,6-galactanase        | TRIREDRAFT_110894 | GH30   | 179340      | 1300.8   |
| TRIREDRAFT_21725  | $\beta$ -hexosaminidase               | Nag1              | GH20   | 161110      | 863.4    |
| TRIREDRAFT_74198  | $\alpha$ -1,2-mannosidase             | TRIREDRAFT_74198  | GH92   | 268640      | 1138.2   |
| TRIREDRAFT_72632  | $\alpha$ -galactosidase               | AgI1              | GH27   | 1541700     | 2329.1   |
| TRIREDRAFT_76672  | $\beta$ -glucosidase                  | cel3a (Bgl1)      | GH3    | 834810      | 81       |

|                   |                                                |                   |           |         |   |
|-------------------|------------------------------------------------|-------------------|-----------|---------|---|
| TRIREDRAFT_68067  | Cell wall protein                              | CwpA              | CWP       | 4705.8  | 0 |
| TRIREDRAFT_120873 | $\alpha$ -1,3-glucanase                        | TRIREDRAFT_120873 | GH71      | 41540   | 0 |
| TRIREDRAFT_73632  | Carbohydrate esterase family 5                 | Axe1              | CE5       | 13187   | 0 |
| TRIREDRAFT_58282  | Carbohydrate esterase family 9                 | TRIREDRAFT_58282  | CE9       | 48051   | 0 |
| TRIREDRAFT_80240  | $\beta$ -galactosidase                         | TRIREDRAFT_80240  | GH35      | 14154   | 0 |
| TRIREDRAFT_104797 | $\beta$ -glucosidase                           | TRIREDRAFT_104797 | GH3       | 33223   | 0 |
| TRIREDRAFT_76227  | $\beta$ -glucosidase                           | TRIREDRAFT_76227  | GH3       | 3512.3  | 0 |
| TRIREDRAFT_80833  | Chitinase                                      | Chi18-5           | GH18      | 636930  | 0 |
| TRIREDRAFT_58239  | Chitinase                                      | TRIREDRAFT_58239  | GH18      | 329.9   | 0 |
| TRIREDRAFT_82616  | Membrane-bound endoglucanase                   | Cel5b             | GH5       | 19466   | 0 |
| TRIREDRAFT_107850 | Feruloyl esterase                              | Fae1              | CE1       | 392.6   | 0 |
| TRIREDRAFT_76852  | $\beta$ -glycosidase                           | TRIREDRAFT_76852  | GH2       | 8630.1  | 0 |
| TRIREDRAFT_124016 | $\beta$ -galactosidase                         | Agl2              | GH36      | 59555   | 0 |
| TRIREDRAFT_77299  | $\beta$ -galactosidase/ $\beta$ -glucuronidase | TRIREDRAFT_77299  | GH2       | 7371    | 0 |
| TRIREDRAFT_66792  | Membrane-bound $\beta$ -glycosidase            | TRIREDRAFT_66792  | GH17      | 77753   | 0 |
| TRIREDRAFT_56996  | Mannan endo-1,4- $\beta$ -mannosidase          | Man5a             | GH5       | 3372200 | 0 |
| TRIREDRAFT_67844  | $\alpha$ -1,6-mannanase                        | TRIREDRAFT_67844  | GH76      | 23799   | 0 |
| TRIREDRAFT_60635  | $\alpha$ -1,2-mannosidase                      | TRIREDRAFT_60635  | GH92      | 2430.0  | 0 |
| TRIREDRAFT_69245  | $\beta$ -mannosidase                           | TRIREDRAFT_69245  | GH2       | 270490  | 0 |
| TRIREDRAFT_27395  | $\alpha$ -1,6-mannanase                        | TRIREDRAFT_27395  | GH76      | 4421.3  | 0 |
| TRIREDRAFT_55733  | $\alpha$ -1,2-mannosidase                      | TRIREDRAFT_55733  | GH92      | 3495.6  | 0 |
| TRIREDRAFT_103049 | Polygalacturonase                              | TRIREDRAFT_103049 | GH28      | 105360  | 0 |
| TRIREDRAFT_123029 | Copper/Zinc superoxide dismutase               | Sod1              | SOD_Cu/Zn | 1306.3  | 0 |
| TRIREDRAFT_123726 | $\beta$ -1,3-1,4-glucanase                     | TRIREDRAFT_123726 | GH16      | 1598.1  | 0 |
| TRIREDRAFT_124175 | $\beta$ -1,3-glucanase                         | TRIREDRAFT_124175 | GH64      | 243580  | 0 |
